# Supplementary material for: Mixed integer programming approaches for nonlinear and stochastic programming
Source: Royal Society of Chemistry journal article supplement (doi:10.1039/d0cp03991h), 2009-07-06
Supplement: d0cp03991h1.pdf [file d0cp03991h1.pdf]

Table S1. The calculated elements of 2D elastic constants matrix and the in-plane stiffness for FeI<sub>3</sub> monolayer.

|                  | $C_{11}$             | $C_{22}$             | $C_{66}$             | $C_{12}$             | $C_{21}$             | $E_x$                | $E_y$                |
|------------------|----------------------|----------------------|----------------------|----------------------|----------------------|----------------------|----------------------|
|                  | (J·m <sup>-2</sup> ) |
| FeI <sub>3</sub> | 17.22                | 17.22                | 11.19                | -5.16                | -5.16                | 15.66                | 15.66                |

Table S2. The calculated elements of 2D elastic constants matrix and the in-plane stiffness for FeI<sub>1.5</sub>X<sub>1.5</sub> (X=Cl, Br) monolayers.

|                                      | $C_{11}$             | $C_{22}$             | $C_{66}$             | $C_{12}$             | $C_{21}$             | $E_x$                | $E_y$                |
|--------------------------------------|----------------------|----------------------|----------------------|----------------------|----------------------|----------------------|----------------------|
|                                      | (J·m <sup>-2</sup> ) |
| FeI <sub>1.5</sub> Cl <sub>1.5</sub> | 35.61                | 35.61                | 15.70                | 4.21                 | 4.21                 | 35.11                | 35.11                |
| FeI <sub>1.5</sub> Br <sub>1.5</sub> | 27.86                | 27.86                | 16.45                | -5.04                | -5.04                | 26.95                | 26.95                |

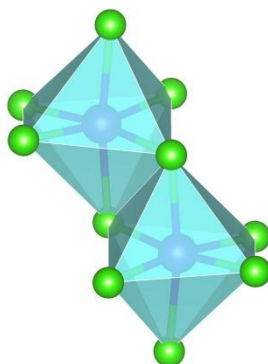

Fig. S1 Structure of the distorted  $\text{FeI}_6$  octahedron for  $\text{FeI}_3$  monolayer.

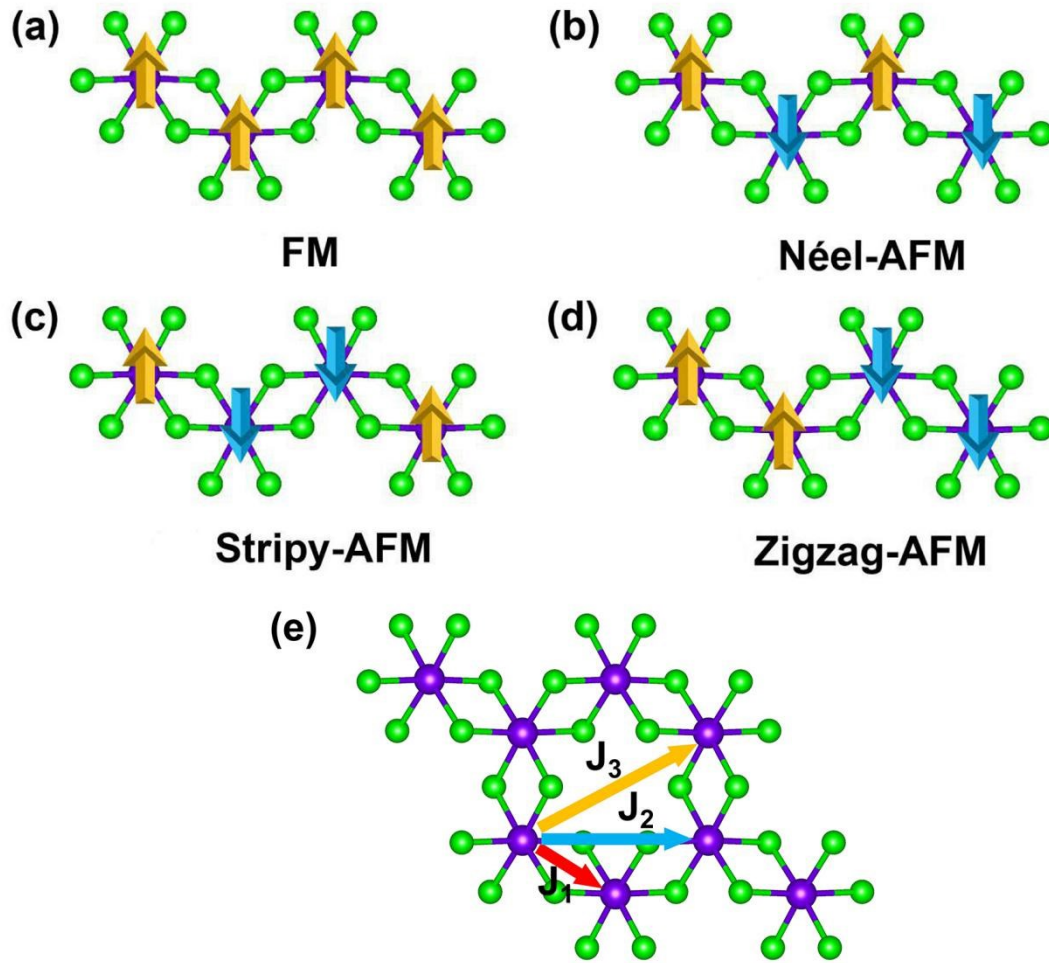

Fig. S2 Four possible magnetic configurations of (a) FM, (b) Néel-AFM, (c) Stripy-AFM, and (d) Zigzag AFM of  $\text{Fe}_3$  monolayer, and (e) the nearest ( $J_1$ ), next-nearest ( $J_2$ ), next next-nearest ( $J_3$ ) magnetic coupling parameters, the yellow and blue arrows represent spin-up and spin-down states of the Fe atoms, respectively.

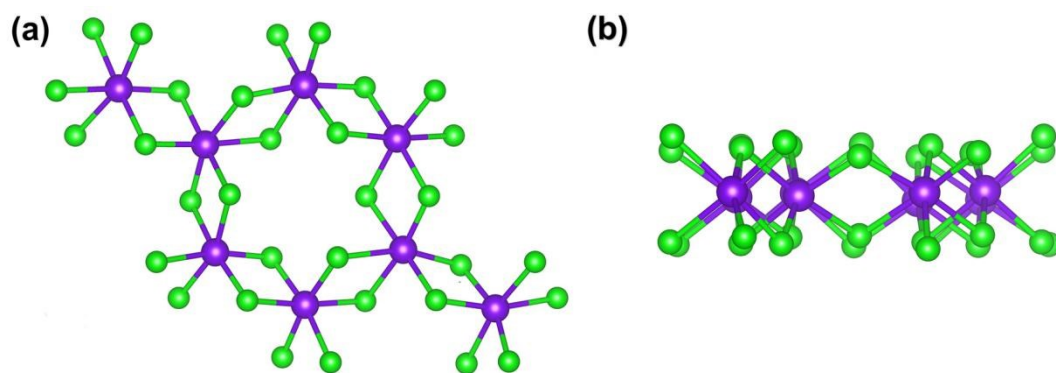

Fig. S3 (a) Top and (b) side views for the snapshots of atomic configurations for FeI<sub>3</sub> monolayer at the end of 5ps AIMD simulation at 300K.

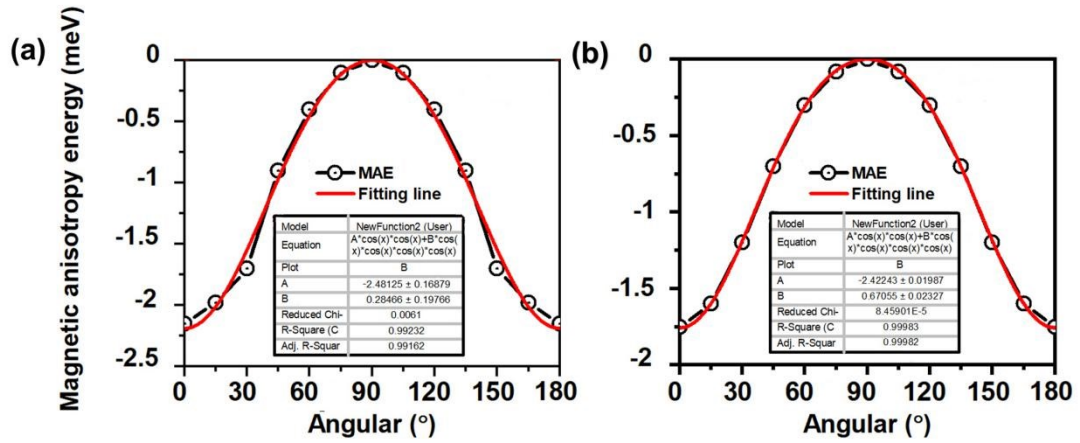

Fig. S4 Magnetic anisotropy energy (MAE) as a function of azimuthal angle for (a) FeI<sub>3</sub> monolayer, and (b) FeI<sub>3</sub> monolayer with 0.1e per unit cell of electron doping. Red solid lines are fitting lines; the inset table lists the standard errors for the fitting slope.

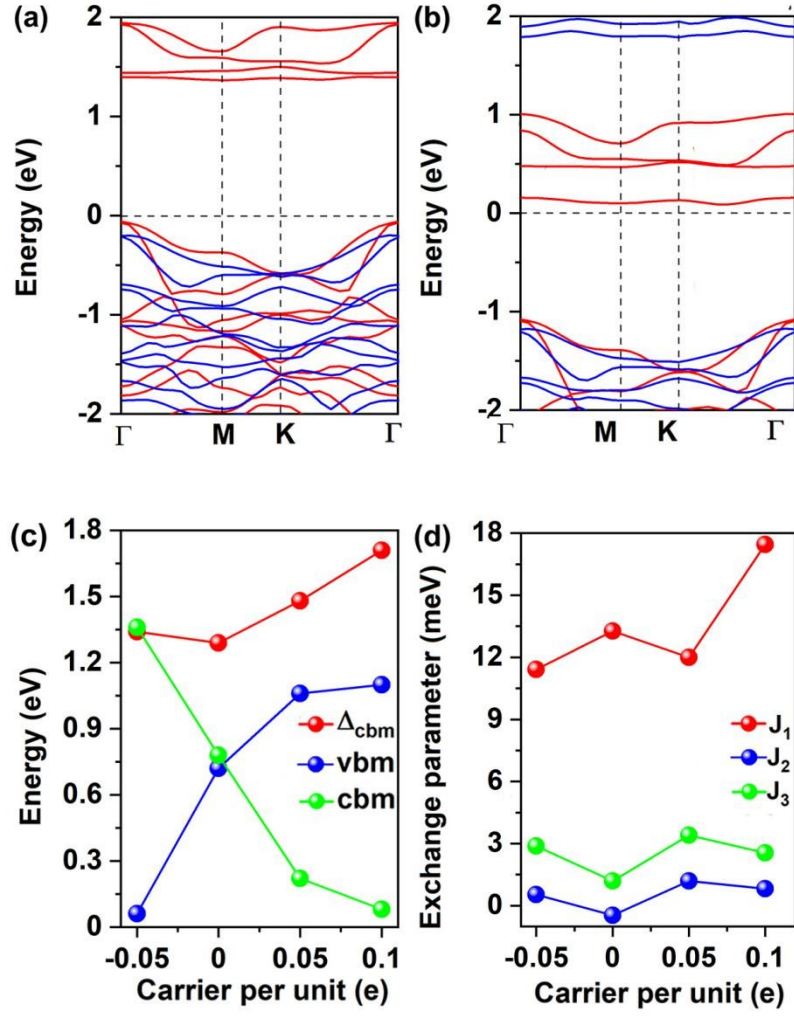

Fig. S5 Spin-resolved electronic band structure of FeI<sub>3</sub> monolayer with (a) -0.05e and (b) 0.1e per unit cell of carrier doping, the Fermi level is set as 0 eV. (c) valence band maximum (VBM), conduction band minimum (CBM),  $\Delta_{cbm}$  and (d) nearest ( $J_1$ ), next-nearest ( $J_2$ ), next next-nearest exchange parameter ( $J_3$ ) of FeI<sub>3</sub> monolayer with carrier doping ranging from -0.05e to 0.1e per unit cell. Positive and negative values represent the electron and hole doping, respectively.

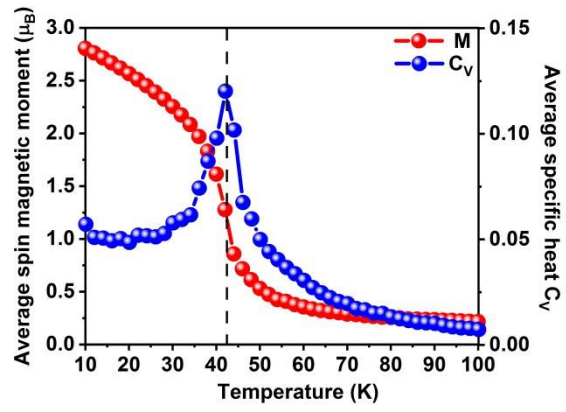

Fig. S6 On-site magnetic moments of Cr atoms and the specific heat  $C_v$  as function of temperature based on Heisenberg model for  $\text{CrI}_3$  monolayer, the value of  $J$  and  $A$  are obtained from Ref 21.

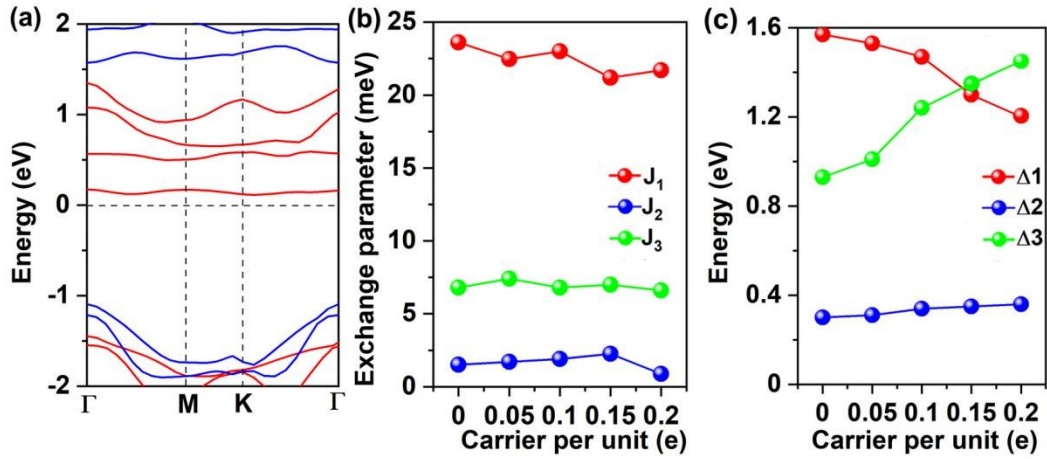

Fig. S7 Spin-resolved electronic band structure of FeI<sub>1.5</sub>Cl<sub>1.5</sub> monolayer with (a) 0.2e per unit cell of carrier doping, the Fermi level is set as 0 eV. (b) Nearest (J<sub>1</sub>), next-nearest (J<sub>2</sub>), next next-nearest exchange parameter (J<sub>3</sub>), (c)  $\Delta_1$ ,  $\Delta_2$ , and  $\Delta_3$  of FeI<sub>1.5</sub>Cl<sub>1.5</sub> monolayer with carrier doping ranging from 0e to 0.2e per unit cell. Positive and negative values represent the electron and hole doping, respectively.

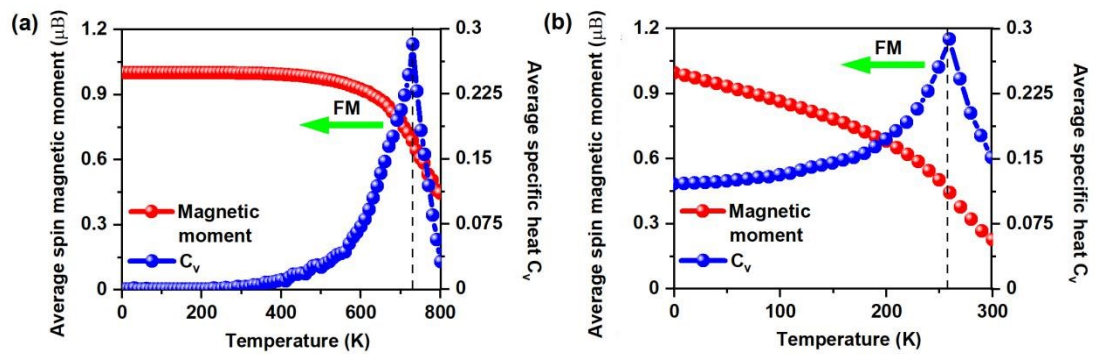

Fig. S8 On-site magnetic moments of Fe atoms and the specific heat  $C_v$  as function of temperature based on (a) Ising model and (b) Heisenberg model for FeI<sub>1.5</sub>Cl<sub>1.5</sub> monolayer with 0.1e electron doping per unit.
